# Supplementary material
Source: Springer Nature journal article supplement (https://www.springermedizin.de/resource/supplementary/12968_2010_982_MOESM4_ESM.pdf/9580094)

**Mean MRI scan time: 35±8min**

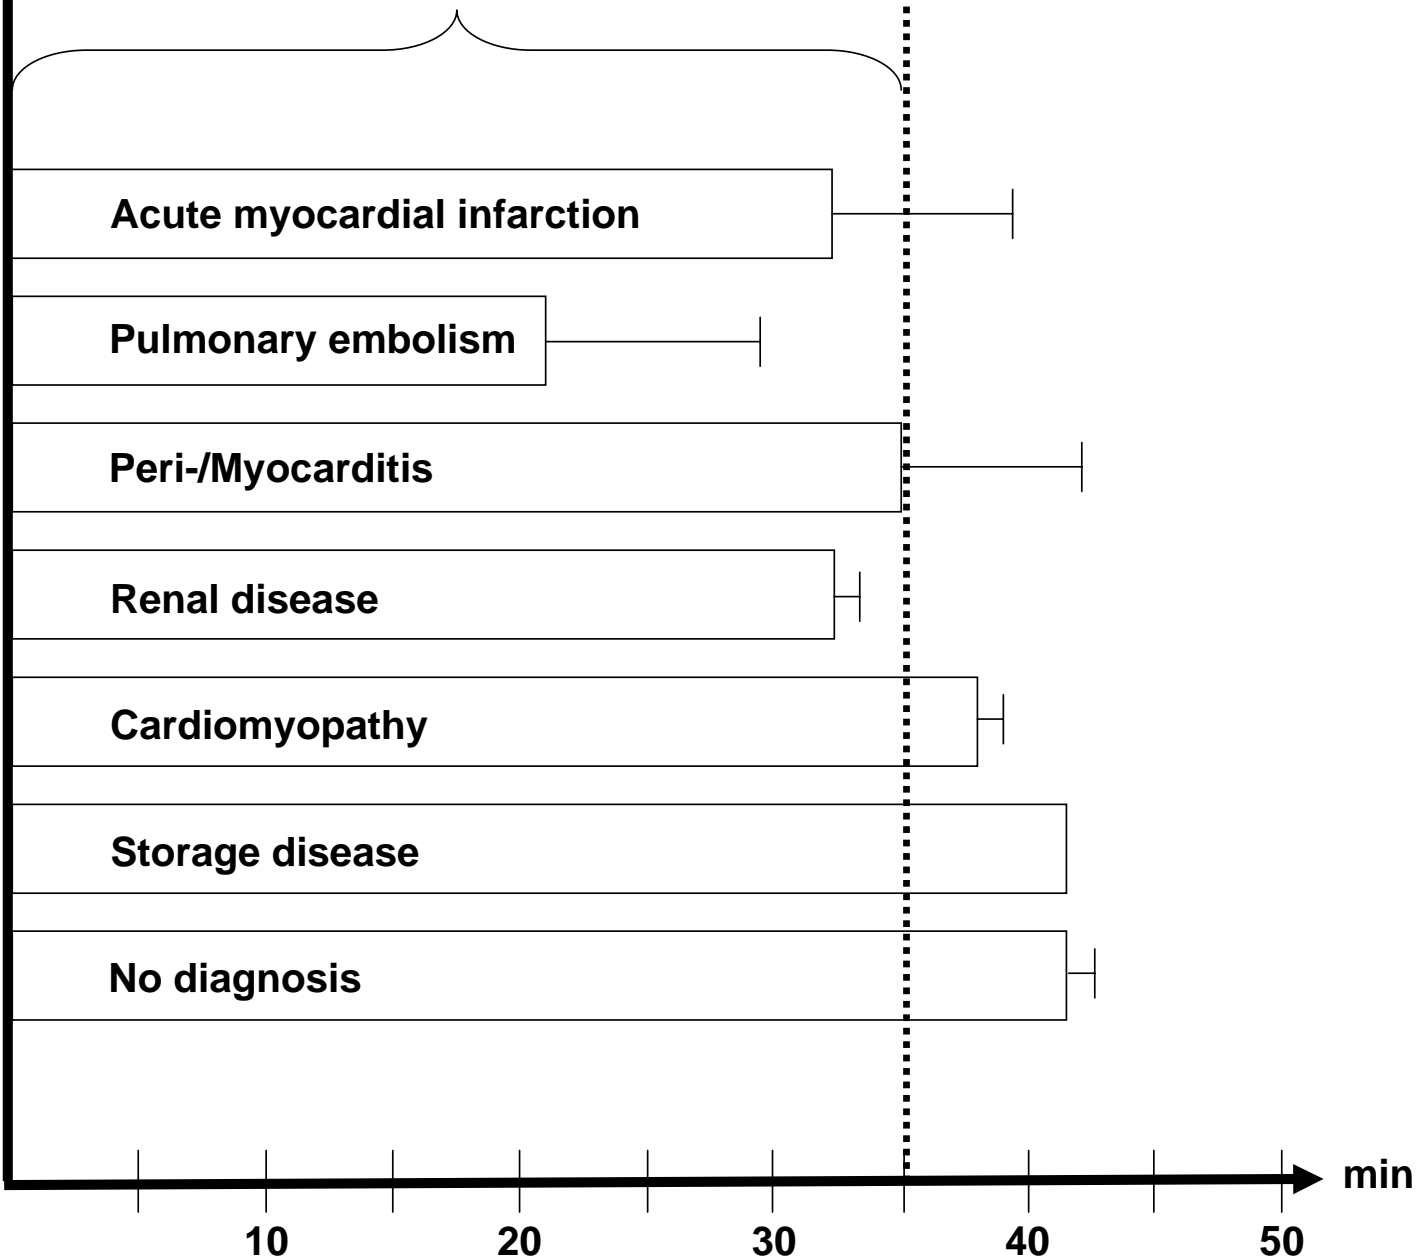

Supplement: MOESM4 [file 9580094]
